# Supplementary material for: A 12-month prospective exploratory study of muscle and fat characteristics in individuals with mild-to-moderate hip osteoarthritis
Source: Springer Nature journal article supplement (doi:10.1186/s12891-019-2668-z), 2019-06-14

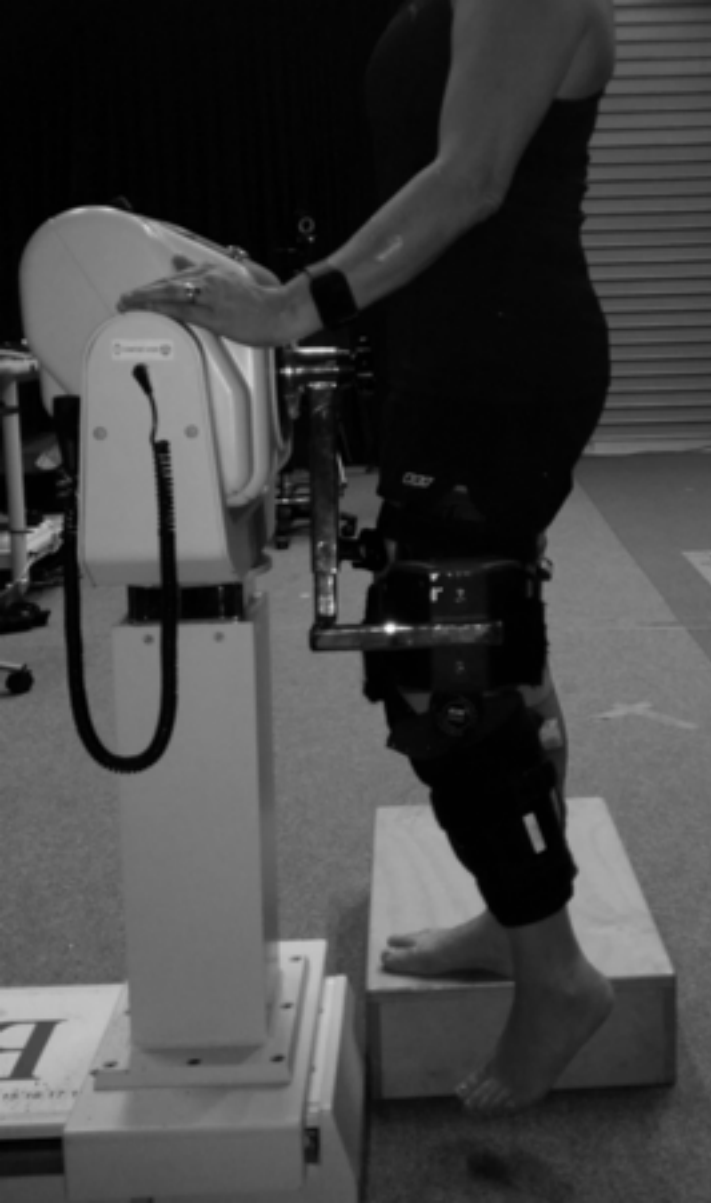

Supplement: MOESM1 [file 16813912]
